# Supplementary material for: Bismuth chalcogenides: multifunctional enhancement of radiopacity, mechanical resilience, and osteogenesis in PMMA bone cements for vertebroplasty
Source: Royal Society of Chemistry journal article supplement (doi:10.1039/d5tb02051d), 2025-12-16
Supplement: d5tb02051d1.pdf [file d5tb02051d1.pdf]

Supporting Information for:

**Bismuth Chalcogenides: Multifunctional Enhancement of Radiopacity, Mechanical Resilience, and Osteogenesis in PMMA Bone Cements for Vertebroplasty**

Tong-Guang Xu<sup>#1,2</sup>, Lin-Xuan Gao<sup>#3</sup>, Liu Yong<sup>1</sup>, Deng Chen<sup>4</sup>, Feng Zhang<sup>5,\*</sup> and Jing-Hui He<sup>3\*</sup>, Bin Meng<sup>2\*</sup>

1. Department of Orthopedics, The People's Hospital of Suzhou New District, Suzhou, Jiangsu 215129, China.

2. Department of Orthopedics, the First Affiliated Hospital of Soochow University, Suzhou, Jiangsu 215000, China.

3. College of Chemistry, Chemical Engineering and Materials Science, Soochow University, Suzhou, Jiangsu 215123, China.

4. Department of Joint Orthopedics, Jingmen Central Hospital, Affiliated to Jingchu University of Technology, Jingmen 448000, China.

5. Analysis and Testing Center, Soochow University, Suzhou, Jiangsu 215123, China.

\*\*Corresponding author: E-mail addresses: [ylfengzhang@suda.edu.cn](mailto:ylfengzhang@suda.edu.cn) (F. Zhang); [jinghhe@suda.edu.cn](mailto:jinghhe@suda.edu.cn) (J.H. He); [mbyang2000@126.com](mailto:mbyang2000@126.com) (B. Meng)

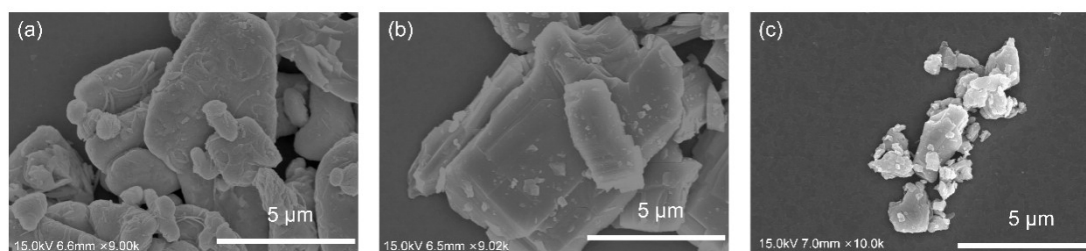

**Figure S1.** SEM images of purchased  $\text{Bi}_2\text{X}_3$  particles: (a)  $\text{Bi}_2\text{O}_3$ , (b)  $\text{Bi}_2\text{S}_3$ , (c)  $\text{Bi}_2\text{Se}_3$ .

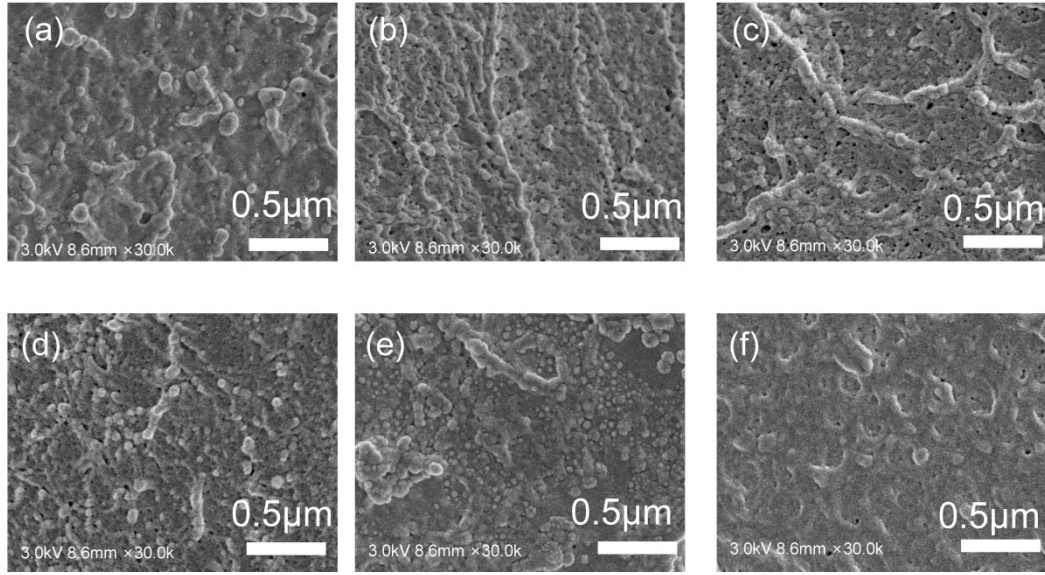

**Figure S2.** SEM images of  $\text{Bi}_2\text{O}_3$ -PMMA bone cement with various  $\text{Bi}_2\text{O}_3$  content of: (a) 0%, (b) 2.5%, (c) 5%, (d) 7.5%, (e) 20%, (f) 30%. The sample with 0%  $\text{Bi}_2\text{O}_3$  refers to the pure PMMA bone cement without  $\text{Bi}_2\text{O}_3$ . The SEM image of the sample with 10%  $\text{Bi}_2\text{O}_3$  is shown in Figure 1 in the main text.

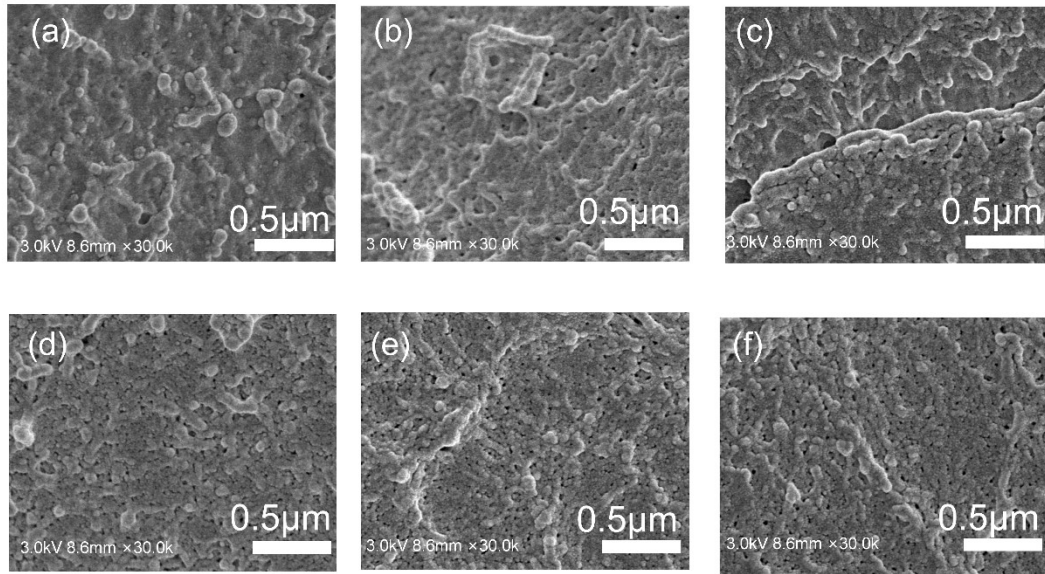

**Figure S3.** SEM images of  $\text{Bi}_2\text{S}_3$ -PMMA bone cement with various  $\text{Bi}_2\text{S}_3$  content of: (a) 0%, (b) 2.5%, (c) 5%, (d) 7.5%, (e) 20%, (f) 30%. The sample with 0%  $\text{Bi}_2\text{S}_3$  refers to the pure PMMA bone cement without  $\text{Bi}_2\text{S}_3$ . The SEM image of the sample with 10%  $\text{Bi}_2\text{S}_3$  is shown in Figure 1 in the main text.

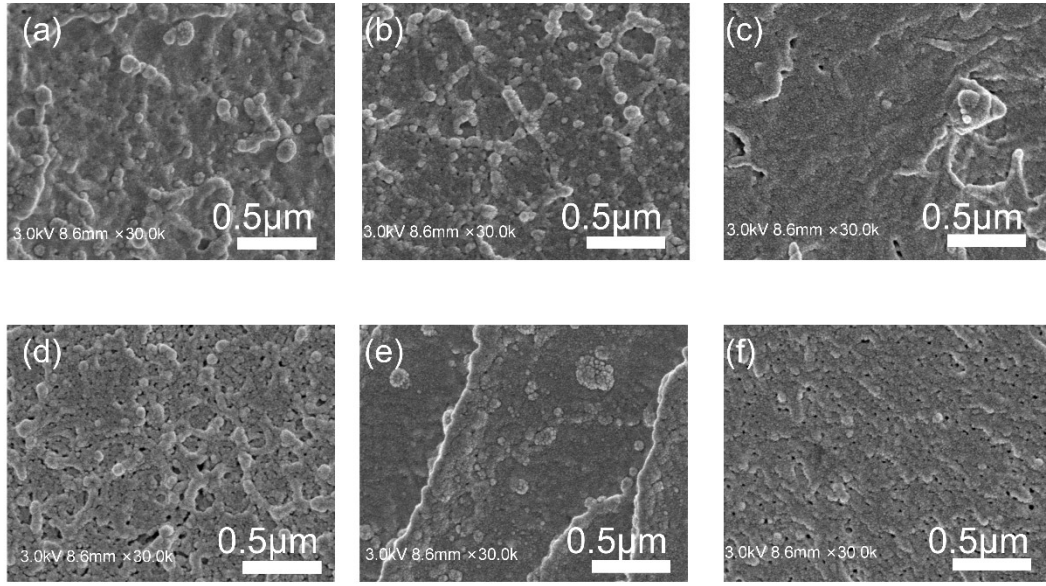

**Figure S4.** SEM images of  $\text{Bi}_2\text{Se}_3$ -PMMA bone cement with various  $\text{Bi}_2\text{Se}_3$  content of: (a) 0%, (b) 2.5%, (c) 5%, (d) 7.5%, (e) 20%, (f) 30%. The sample with 0%  $\text{Bi}_2\text{Se}_3$  refers to the pure PMMA bone cement without  $\text{Bi}_2\text{Se}_3$ . The SEM image of the sample with 10%  $\text{Bi}_2\text{Se}_3$  is shown in Figure 1 in the main text.

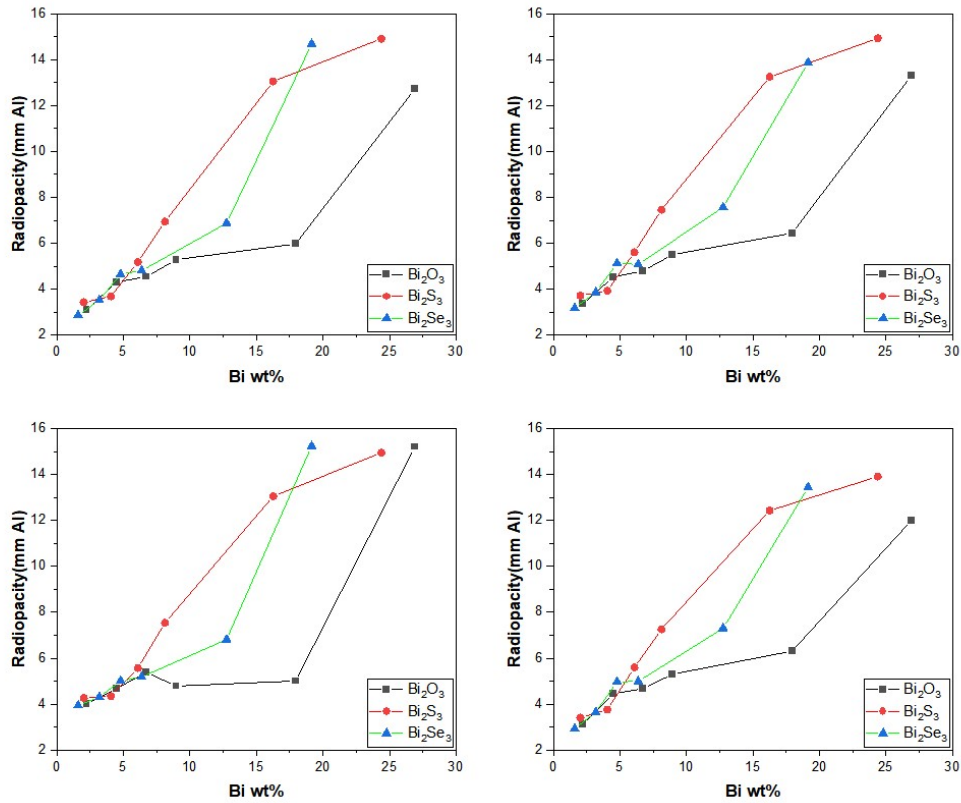

**Figure S5.** Radiopacity of  $\text{Bi}_2\text{X}_3$ -PMMA bone cements with varying Bi contents at different tube voltages: (a) 80.9 kV, (b) 80.9 kV, (c) 101.9 kV, (d) 120.9 kV. Radiopacity values were determined from Figure 5. The Bi element content is calculated from its  $\text{Bi}_2\text{X}_3$  weigh ratio in each  $\text{Bi}_2\text{X}_3$ -PMMA sample.

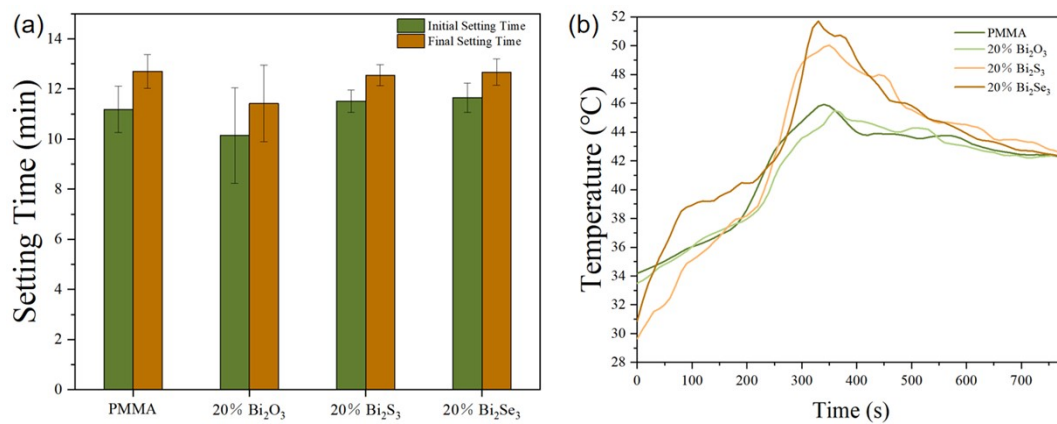

**Figure S6.** Curing properties of commercial PMMA and 20% Bi<sub>2</sub>X<sub>3</sub> (X=O, S, Se)-PMMA bone cements. (a) Initial and final setting times; (b) Curing temperature changes at 37°C constant temperature. Error bars represent standard deviations (n=3).
